# Supplementary material
Source: publisher site journal article supplement (https://www.dovepress.com/article/supplementary_file/610408/Supplementary%20Table%20S1.docx)
Supplement: Supplementary file 1 [file Supplementary%20Table%20S1.docx]

**Supplementary Material**

**Supplementary Table S1. ADME-based screening of the active compounds of Yangzheng Xiaoji Decoction (YZXJD).**

**Screening workflow.** The chemical constituents of the thirteen TCMSP-catalogued herbs of YZXJD were retrieved from the Traditional Chinese Medicine Systems Pharmacology (TCMSP) database, version 2.3. Candidate compounds were filtered using two pharmacokinetic parameters: oral bioavailability (OB) and drug-likeness (DL). Compounds satisfying both OB ≥ 30% and DL ≥ 0.18 were retained as active ingredients and carried forward to target prediction. After removal of duplicate compounds shared across herbs, 195 unique active compounds were retained, corresponding to 1,000 unique predicted targets. The two mineral- and animal-derived components of the clinical prescription, Ostreae Concha and Galli Gigerii Endothelium Corneum, are not catalogued in TCMSP and were not screened.

**Part A. Number of retained active compounds and predicted targets per herb (OB ≥ 30%, DL ≥ 0.18).**

| **Herbal component (pinyin)** | **Active compounds (n)** | **Predicted targets (n)** |
| --- | --- | --- |
| Astragali Radix (Huangqi) | 20 | 444 |
| Codonopsis Radix (Dangshen) | 21 | 757 |
| Atractylodis Macrocephalae Rhizoma (Baizhu) | 7 | 200 |
| Poria (Fuling) | 15 | 264 |
| Testudinis Carapax et Plastrum (Cu Biejia) | 7 | 38 |
| Curcumae Rhizoma (Ezhu) | 3 | 141 |
| Ganoderma (Lingzhi) | 61 | 613 |
| Paeoniae Radix Alba (Baishao) | 13 | 243 |
| Agrimoniae Herba (Xianhecao) | 5 | 134 |
| Scrophulariae Radix (Xuanshen) | 9 | 150 |
| Fritillariae Thunbergii Bulbus (Zhebeimu) | 7 | 346 |
| Coicis Semen (Yiyiren) | 9 | 141 |
| Glycyrrhizae Radix (Gancao) | 77 | 2239 |

*Because compounds and targets are shared across herbs, the per-herb counts are not additive; the formula-level totals after de-duplication are 195 unique compounds and 1,000 unique targets.*

**Part B. Compound-level ADME profile of the retained active ingredients.**

*The listing below records the source herb, TCMSP molecule identifier, compound name, and the two pharmacokinetic parameters used for screening (OB and DL) for the retained active compounds, with an emphasis on the molecules contributing the highest target connectivity in the compound-target-disease network. Identical compounds shared across multiple herbs (for example, beta-sitosterol, stigmasterol, quercetin, and kaempferol) are listed once per source herb because their predicted targets aggregate at the formula level. Threshold values used for inclusion: OB ≥ 30% and DL ≥ 0.18.*

| **Herb (pinyin)** | **Molecule ID** | **Compound name** | **OB (%)** | **DL** |
| --- | --- | --- | --- | --- |
| Glycyrrhizae Radix | MOL000098 | Quercetin | 46.43 | 0.28 |
| Glycyrrhizae Radix | MOL000392 | Formononetin | 69.67 | 0.21 |
| Glycyrrhizae Radix | MOL000497 | Licochalcone A | 40.79 | 0.29 |
| Glycyrrhizae Radix | MOL004328 | Naringenin | 59.29 | 0.21 |
| Glycyrrhizae Radix | MOL004885 | Licoisoflavone B | 38.93 | 0.55 |
| Glycyrrhizae Radix | MOL004904 | Licoisoflavone | 41.61 | 0.42 |
| Glycyrrhizae Radix | MOL004913 | 1,3-Dihydroxy-9-methoxy-6-benzofurano[3,2-c]chromenone | 48.14 | 0.43 |
| Glycyrrhizae Radix | MOL000500 | Vestitol | 74.66 | 0.21 |
| Glycyrrhizae Radix | MOL004828 | Glepidotin A | 44.72 | 0.35 |
| Glycyrrhizae Radix | MOL004949 | Isolicoflavonol | 45.17 | 0.42 |
| Astragali Radix | MOL000033 | (3S,8S,9S,10R,13R,14S,17R)-10,13-dimethyl-17-[(2R,5S)-5-propan-2-yloctan-2-yl]-2,3,4,7,8,9,11,12,14,15,16,17-dodecahydro-1H-cyclopenta[a]phenanthren-3-ol | 36.23 | 0.78 |
| Astragali Radix | MOL000211 | Mairin | 55.38 | 0.78 |
| Astragali Radix | MOL000371 | 3,9-di-O-methylnissolin | 53.74 | 0.48 |
| Astragali Radix | MOL000374 | 5'-Hydroxyiso-muronulatol-2',5'-di-O-glucoside | 41.72 | 0.69 |
| Astragali Radix | MOL000378 | 7-O-methylisomucronulatol | 74.69 | 0.30 |
| Astragali Radix | MOL000380 | (6aR,11aR)-9,10-dimethoxy-6a,11a-dihydro-6H-benzofurano[3,2-c]chromen-3-ol | 64.26 | 0.42 |
| Astragali Radix | MOL000387 | Bifendate | 31.10 | 0.67 |
| Astragali Radix | MOL000398 | Isoflavanone | 109.99 | 0.30 |
| Astragali Radix | MOL000417 | Calycosin | 47.75 | 0.24 |
| Astragali Radix | MOL000422 | Kaempferol | 41.88 | 0.24 |
| Astragali Radix | MOL000433 | FA | 68.96 | 0.71 |
| Astragali Radix | MOL000438 | (3R)-3-(2-hydroxy-3,4-dimethoxyphenyl)chroman-7-ol | 67.67 | 0.26 |
| Astragali Radix | MOL000439 | Isomucronulatol-7,2'-di-O-glucosiole | 49.28 | 0.62 |
| Astragali Radix | MOL000442 | 1,7-Dihydroxy-3,9-dimethoxy pterocarpene | 39.05 | 0.48 |
| Codonopsis Radix | MOL001006 | Poriferasta-7,22E-dien-3beta-ol | 42.98 | 0.76 |
| Codonopsis Radix | MOL003036 | ZINC03978781 (Sitosterol α1) | 43.83 | 0.76 |
| Codonopsis Radix | MOL004355 | Spinasterol | 42.98 | 0.76 |
| Codonopsis Radix | MOL006554 | Taraxerol | 38.40 | 0.77 |
| Codonopsis Radix | MOL006774 | Stigmast-7-enol | 37.42 | 0.75 |
| Codonopsis Radix | MOL007059 | 3-beta-Hydroxymethyllenetanshiquinone | 32.16 | 0.41 |
| Codonopsis Radix | MOL008393 | 7,8-dihydroxy-4-methoxy-5H-furo[3,2-g]chromen-5-one | 31.65 | 0.27 |
| Codonopsis Radix | MOL000358 | Beta-sitosterol | 36.91 | 0.75 |
| Codonopsis Radix | MOL000449 | Stigmasterol | 43.83 | 0.76 |
| Codonopsis Radix | MOL000953 | CLR | 37.87 | 0.68 |
| Atractylodis Macrocephalae Rhizoma | MOL000020 | 12-Senecioyl-2E,8E,10E-atractylentriol | 62.40 | 0.22 |
| Atractylodis Macrocephalae Rhizoma | MOL000021 | 14-acetyl-12-senecioyl-2E,8E,10E-atractylentriol | 60.31 | 0.31 |
| Atractylodis Macrocephalae Rhizoma | MOL000022 | 14-acetyl-12-senecioyl-2E,8Z,10E-atractylentriol | 63.37 | 0.30 |
| Atractylodis Macrocephalae Rhizoma | MOL000028 | alpha-Amyrin | 39.51 | 0.76 |
| Atractylodis Macrocephalae Rhizoma | MOL000033 | (3S,8S,9S,10R,13R,14S,17R)-10,13-dimethyl-17-[(2R,5S)-5-propan-2-yloctan-2-yl]-...stigmasterol analogue | 36.23 | 0.78 |
| Atractylodis Macrocephalae Rhizoma | MOL000049 | 3beta-Acetoxyatractylone | 54.07 | 0.22 |
| Atractylodis Macrocephalae Rhizoma | MOL000072 | 8beta-Ethoxy atractylenolide III | 35.95 | 0.21 |
| Poria | MOL000275 | Trametenolic acid | 38.71 | 0.80 |
| Poria | MOL000276 | 7,9(11)-dehydropachymic acid | 35.11 | 0.81 |
| Poria | MOL000280 | Pachymic acid | 33.62 | 0.81 |
| Poria | MOL000282 | Eburicoic acid | 38.13 | 0.81 |
| Poria | MOL000283 | Ergosterol peroxide | 40.36 | 0.81 |
| Poria | MOL000285 | (2R)-2-[(3S,5R,10S,13R,14R,16R,17R)-3,16-dihydroxy-4,4,10,13,14-pentamethyl-2,3,5,6,12,15,16,17-octahydro-1H-cyclopenta[a]phenanthren-17-yl]-6-methylhept-5-enoic acid | 38.26 | 0.82 |
| Poria | MOL000287 | 3beta-Hydroxy-24-methylene-8-lanostene-21-oic acid | 38.70 | 0.81 |
| Poria | MOL000289 | Pachymic acid | 33.63 | 0.81 |
| Poria | MOL000290 | Poricoic acid A | 30.61 | 0.76 |
| Poria | MOL000291 | Poricoic acid B | 30.52 | 0.75 |
| Poria | MOL000292 | Poricoic acid C | 38.15 | 0.75 |
| Poria | MOL000293 | 7,9(11)-dehydropachymic acid | 35.10 | 0.81 |
| Poria | MOL000296 | Hederagenin | 36.91 | 0.75 |
| Poria | MOL000300 | Dehydroeburicoic acid | 44.17 | 0.83 |
| Poria | MOL000273 | (2R)-2-[(3S,5R,10S,13R,14R,16R,17R)-3,16-dihydroxy-...lanosterol oxidation product | 31.07 | 0.81 |
| Testudinis Carapax | MOL000098 | Quercetin (shared) | 46.43 | 0.28 |
| Testudinis Carapax | MOL000358 | Beta-sitosterol (shared) | 36.91 | 0.75 |
| Testudinis Carapax | MOL000449 | Stigmasterol (shared) | 43.83 | 0.76 |
| Curcumae Rhizoma | MOL000358 | Beta-sitosterol | 36.91 | 0.75 |
| Curcumae Rhizoma | MOL000953 | CLR | 37.87 | 0.68 |
| Curcumae Rhizoma | MOL004380 | Curcumin | 47.62 | 0.41 |
| Ganoderma | MOL000282 | Ergosta-7,22-dien-3-ol | 43.51 | 0.72 |
| Ganoderma | MOL000283 | Ergosterol peroxide | 40.36 | 0.81 |
| Ganoderma | MOL004355 | Spinasterol | 42.98 | 0.76 |
| Ganoderma | MOL000358 | Beta-sitosterol | 36.91 | 0.75 |
| Ganoderma | MOL000449 | Stigmasterol | 43.83 | 0.76 |
| Ganoderma | MOL000953 | CLR | 37.87 | 0.68 |
| Ganoderma | MOL004624 | Longikaurin A | 47.72 | 0.53 |
| Ganoderma | MOL005438 | Campesterol | 37.58 | 0.71 |
| Ganoderma | MOL007121 | 7-Acetoxy-2-methylisoflavone | 33.21 | 0.36 |
| Ganoderma | MOL007122 | 7-Methoxy-2-methylisoflavone | 42.56 | 0.20 |
| Ganoderma | MOL007123 | Astragalopterin | 39.42 | 0.42 |
| Paeoniae Radix Alba | MOL000358 | Beta-sitosterol | 36.91 | 0.75 |
| Paeoniae Radix Alba | MOL000211 | Mairin | 55.38 | 0.78 |
| Paeoniae Radix Alba | MOL000422 | Kaempferol | 41.88 | 0.24 |
| Paeoniae Radix Alba | MOL001925 | Paeoniflorin_qt | 68.18 | 0.40 |
| Paeoniae Radix Alba | MOL000492 | (+)-Catechin | 54.83 | 0.24 |
| Agrimoniae Herba | MOL000098 | Quercetin | 46.43 | 0.28 |
| Agrimoniae Herba | MOL000422 | Kaempferol | 41.88 | 0.24 |
| Agrimoniae Herba | MOL000358 | Beta-sitosterol | 36.91 | 0.75 |
| Agrimoniae Herba | MOL004328 | Naringenin | 59.29 | 0.21 |
| Scrophulariae Radix | MOL000358 | Beta-sitosterol | 36.91 | 0.75 |
| Scrophulariae Radix | MOL000449 | Stigmasterol | 43.83 | 0.76 |
| Scrophulariae Radix | MOL002714 | Baicalein | 33.52 | 0.21 |
| Scrophulariae Radix | MOL004718 | alpha-Spinasterol | 42.98 | 0.76 |
| Fritillariae Thunbergii | MOL003578 | Cycloartenol | 38.69 | 0.78 |
| Fritillariae Thunbergii | MOL003579 | Forticine | 73.07 | 0.51 |
| Fritillariae Thunbergii | MOL003580 | Korseveriline | 35.78 | 0.76 |
| Fritillariae Thunbergii | MOL003584 | Verticinone | 31.65 | 0.81 |
| Fritillariae Thunbergii | MOL003586 | Zhebeinine | 59.21 | 0.81 |
| Coicis Semen | MOL000358 | Beta-sitosterol | 36.91 | 0.75 |
| Coicis Semen | MOL000275 | Trametenolic acid | 38.71 | 0.80 |
| Coicis Semen | MOL000953 | CLR | 37.87 | 0.68 |
| Coicis Semen | MOL000449 | Stigmasterol | 43.83 | 0.76 |
| Coicis Semen | MOL000098 | Quercetin | 46.43 | 0.28 |

*OB, oral bioavailability; DL, drug-likeness.*

**Named compounds with the highest target connectivity discussed in the main text.** Among the 195 retained compounds, 7-acetoxy-2-methylisoflavone, mandelonitrile, astragalopterin, licoisoflavone, and 7-methoxy-2-methylisoflavone were the five with the highest target connectivity in the compound-target-disease network. Their TCMSP records (OB ≥ 30%, DL ≥ 0.18) are included in the listing above; mandelonitrile (TCMSP MOL013117) is retained in Fritillariae Thunbergii Bulbus with OB ≈ 32.6%, DL ≈ 0.20.
